# Supplementary material for: Zebra Finch Females Can Assess Male Quality via Olfaction
Source: Preprints.org preprint supplement (doi:10.20944/preprints202305.2241.v1), 2023-05-31
Supplement: Supplementary file 1 [file supplementary]

**Table 1.** Data used in the experimental study to examine whether zebra finch females can assess male quality thought olfaction.

| Focal bird | Choice | Side | Pair |
| --- | --- | --- | --- |
| 24 | 1 | 0 | 1 |
| 25 | 1 | 1 | 1 |
| 9 | 0 | 0 | 2 |
| 12 | 0 | 1 | 2 |
| 19 | 1 | 0 | 3 |
| 28 | 1 | 1 | 3 |
| 8 | 0 | 0 | 4 |
| 14 | 0 | 1 | 4 |
| 10 | 0 | 1 | 5 |
| 16 | 1 | 0 | 5 |
| 2 | 1 | 1 | 6 |
| 26 | 0 | 0 | 6 |
| 4 | 0 | 1 | 7 |
| 17 | 0 | 0 | 7 |
| 1 | 1 | 1 | 8 |
| 21 | 0 | 0 | 8 |
| 7 | 0 | 1 | 9 |
| 13 | 0 | 0 | 9 |
| 3 | 0 | 1 | 10 |
| 23 | 0 | 0 | 10 |
| 5 | 0 | 0 | 11 |
| 18 | 0 | 1 | 11 |
| 11 | 0 | 0 | 12 |
| 15 | 1 | 1 | 12 |
| 20 | 0 | 1 | 13 |
| 27 | 0 | 0 | 13 |
| 6 | 0 | 1 | 14 |
| 22 | 0 | 0 | 14 |
